# Supplementary material for: Conformational equilibrium of MinE regulates the allowable concentration ranges of a protein wave for cell division
Source: Royal Society of Chemistry journal article supplement (doi:10.1039/d0nr00242a), 2020-01-01
Supplement: d0nr00242a1.pdf [file d0nr00242a1.pdf]

## Supplementary Files

### Conformational equilibrium of MinE regulates allowable concentration ranges of a protein wave for cell division

Shunshi Kohyama<sup>1</sup>, Kei Fujiwara<sup>1,\*</sup>, Natsuhiko Yoshinaga<sup>2,3</sup>, Nobuhide Doi<sup>1</sup>

#### Affiliations

<sup>1</sup> Department of Biosciences & Informatics, Keio University, 3-14-1 Hiyoshi, Kohoku-ku, Yokohama 223–8522, Japan.

<sup>2</sup> Mathematical Science Group, WPI Advanced Institute for Materials Research (WPI-AIMR), Tohoku University Katahira 2-1-1, Aoba-Ku, Sendai 9808577, Japan.

<sup>3</sup> MathAM-OIL, AIST, Sendai 980-8577, Japan.

\*corresponding author: Kei Fujiwara

Department of Biosciences & Informatics, Keio University

3-14-1 Hiyoshi, Kohoku-ku, Yokohama 223–8522, Japan

Tel : +81-(0)45-566-1533

**e-mail:** fujiwara@bio.keio.ac.jp

Contents:

**Supplementary Table S1.** Periods of Min waves emerged by wildtype and  $\Delta$ MTS MinE

**Supplementary Table S2.** Primers used in this study

**Supplementary Figure S1.** Min wave emergence tests using artificial cells entrapping MinDE and higher concentration of BSA

**Supplementary Figure S2.** Time plots of Min waves by various concentrations of MinE wildtype and mutants at fixed points

**Supplementary Figure S3.** Overexpression assays for MTS deletion mutant of MinE

**Supplementary Figure S4.** Position and time plots of Min waves by  $\Delta$ MTS mutants of MinE

**Supplementary Movie S1.** Min waves in artificial cells encapsulating various concentration of MinE and its mutants

**Supplementary Movie S2.** Min waves in artificial cells encapsulating various concentration of MTS deletion mutants of MinE

**Supplementary Table S1.** Periods of Min waves emerged by wildtype and  $\Delta$ MTS MinE

| MinE conc.  | Wildtype           | $\Delta$ MTS       |
|-------------|--------------------|--------------------|
| 0.3 $\mu$ M | 230 $\pm$ 36 (sec) | 207 $\pm$ 14 (sec) |
| 1 $\mu$ M   | 116 $\pm$ 6 (sec)  | 80 $\pm$ 12 (sec)  |
| 10 $\mu$ M  | No wave            | 25 $\pm$ 4 (sec)   |

| Name                    | Sequence                      | note                        |
|-------------------------|-------------------------------|-----------------------------|
| sfGFP_V206K_fw          | CAATCTAAACTTTTCGAAAGATCCCAAC  | V206K mutation for sfGFP    |
| sfGFP_V206K_rev         | CGAAAGTTTAGATTGTGTGTCGACAGGTA | V206K mutation for sfGFP    |
| MinE_I24N_fw            | CTGCAGAATATTGTTGCTGAACGCCG    | I24N mutation for MinE      |
| MinE_I24N_rev           | AACAATATTCTGCAGCCGTTCTTTTG    | I24N mutation for MinE      |
| MinE_ $\Delta$ 2-12_fw  | ACATATGAACACAGCCAACATTGCA     | MTS deletion for MinE       |
| MinE_ $\Delta$ 2-12_rev | GCTGTGTTTCATATGTATATCTCCTTC   | MTS deletion for MinE       |
| MinE_V49A_fw            | CTTGAGGCGATTTGTAAATACGTACAA   | V49A mutation for MinE      |
| MinE_V49A_rev           | ACAAATCGCCTCAAGAATATCTTTACG   | V49A mutation for MinE      |
| MinE_D45A/V49A_fw       | CGTAAAGCGATTCTTGAGGCGATTTGT   | D45A mutation for MinE V49A |
| MinE_D45A/V49A_rev      | AAGAATCGCTTTACGCAACTGCGGCAG   | D45A mutation for MinE V49A |
| MinE_I74M_fw            | TTTCTATGCTTGAGCTGAACGTGACC    | I74M mutation for MinE      |
| MinE_I74M_rev           | GCTCAAGCATAGAAATATCGCCATCT    | I74M mutation for MinE      |

**Supplementary Table S2.** Primers used in this study

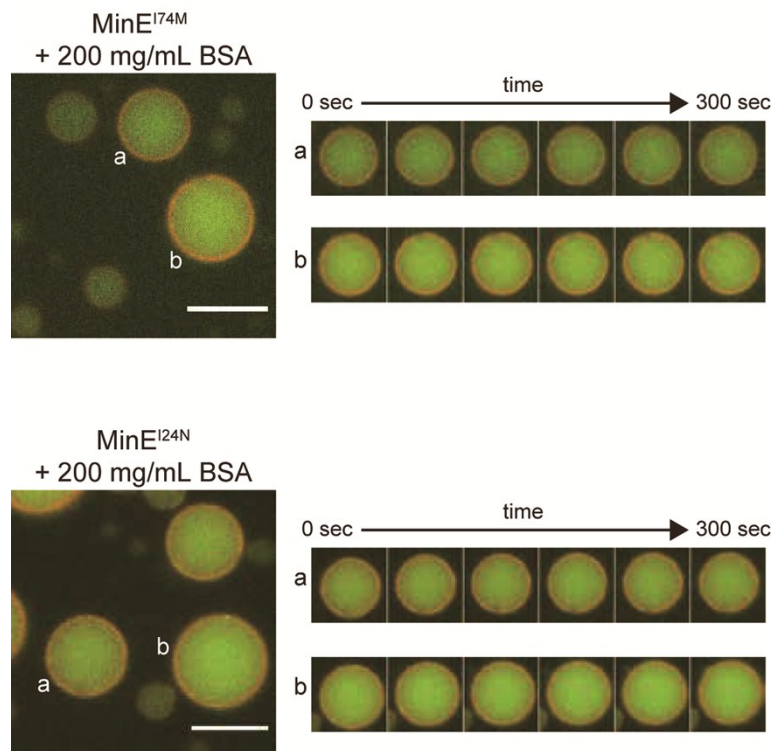

**Supplementary Figure S1. Min wave emergence tests using artificial cells entrapping MinDE and higher concentration of BSA**

The same experiments as Figure 2 except using 200 mg/mL BSA instead of 100 mg/mL BSA. Only the results of I74M and I24N which show lower  $c/m$  of MinE (Figure 2B) are shown. Scale bars indicate 20  $\mu\text{m}$ .

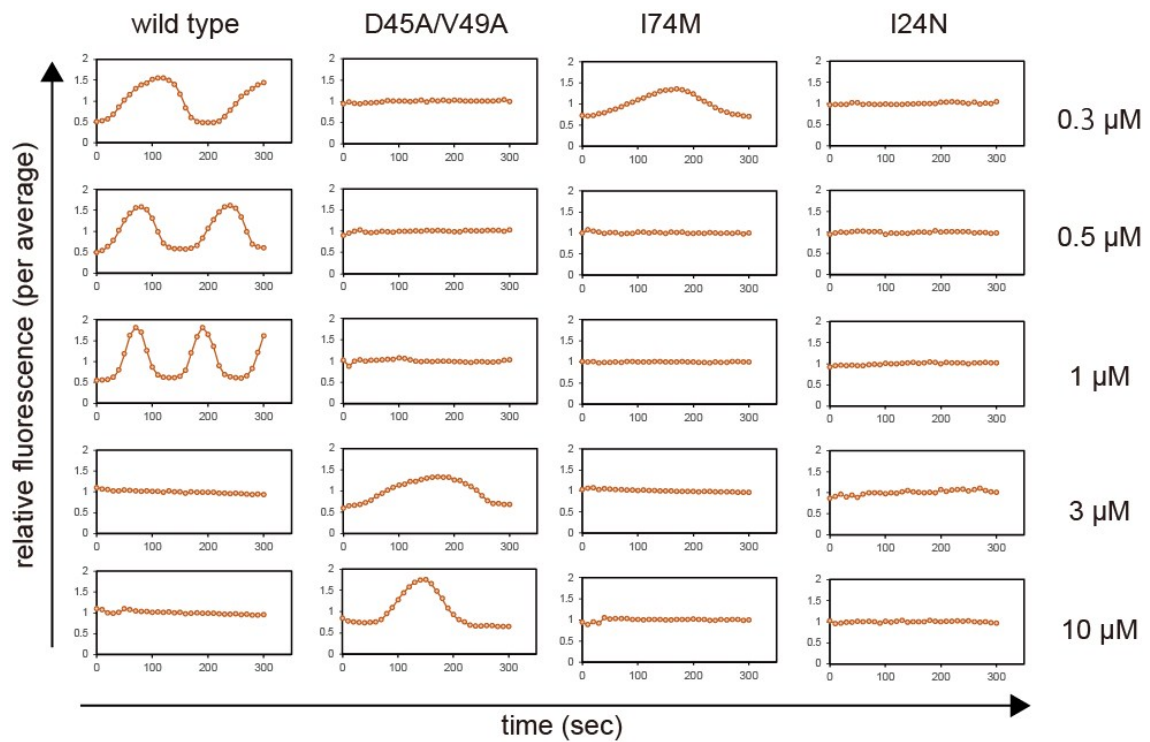

**Supplementary Figure S2. Time plots of Min waves by various concentrations of MinE wildtype and mutants at fixed points**

Representative time plots of MinD localization under each condition are shown. Time intervals are 10 sec (total 300 sec). Relative fluorescent intensities normalized by its average intensity during 300 sec are the vertical axis.

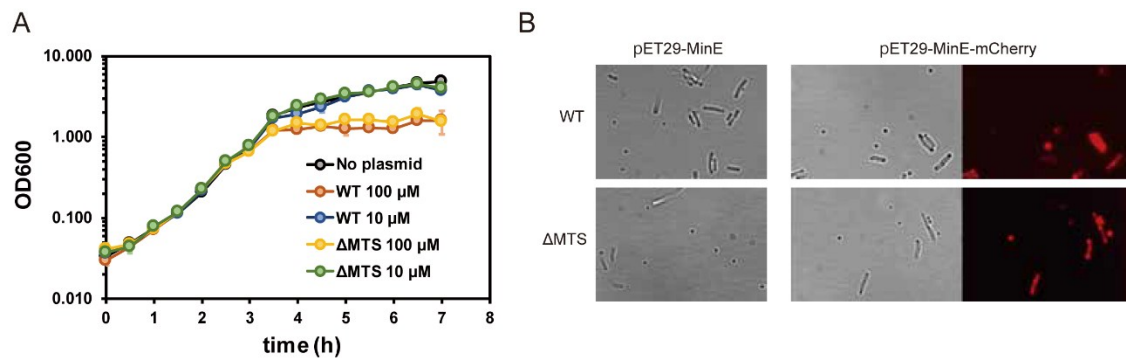

**Supplementary Figure S3. Overexpression assays for the MTS deletion mutant of MinE**

A: Growth curves of *E. coli* harboring the plasmid encoding WT MinE or MinE $\Delta$ MTS are shown. Average and standard deviation of triplicates are shown. IPTG concentrations (10  $\mu$ M and 100  $\mu$ M) are also shown. B: A minicell phenotype observed by microscope. IPTG was supplied to *E. coli* harboring the plasmid encoding WT MinE or MinE $\Delta$ MTS, and cell morphology was observed by microscope. The red color at the right panel indicate mCherry fluorescence of MinE-mCherry and MinE $\Delta$ MTS-mCherry. IPTG was supplied at 100  $\mu$ M.

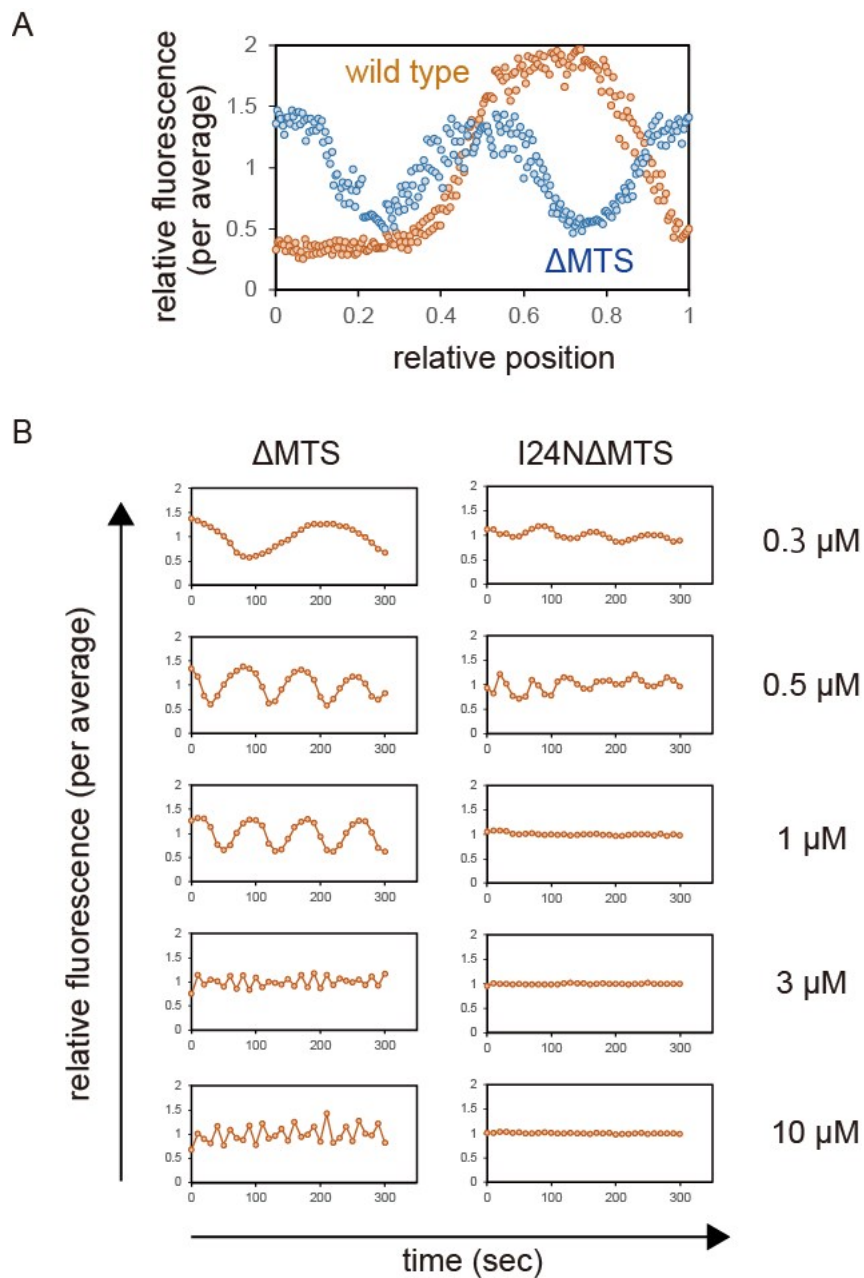

**Supplementary Figure S4. Position and time plots of Min waves by  $\Delta$ MTS mutants of MinE**

A: Representative position plots of Min waves by wildtype MinE and its  $\Delta$ MTS mutant. Relative fluorescent intensities normalized by the average intensity on the surface of each microdroplet are the vertical axis. Positions were normalized by 1 circle as 1 (namely, 0 and 1 is very near). Orange and blue points indicate the position intensities of the wildtype or the  $\Delta$ MTS mutant, respectively.

B: Representative time plots under each condition are shown. Time intervals are 10 sec (total 300 sec). Relative fluorescent intensities normalized by its average intensity during 300 sec are the vertical axis.
